# Supplementary material
Source: PubMed Central journal article supplement (PMC4250431)

1 C3 fragment deposition was analyzed by flow cytometry LSRII (BD Biosciences) in  
2 Patient 2 (on eculizumab therapy) and Patient 6 (not on eculizumab therapy).

3 PNH erythrocytes were incubated at 37°C for 1 hour with heat-inactivated eculizumab-  
4 containing serum, pH 6.4 (aEcuHS[H], Top), activated (pH 6.4) eculizumab-containing  
5 serum (aEcuHS, Middle), and activated (pH 6.4) eculizumab-containing serum plus  
6 C1INH at 6U/mL (aEcuHS + C1INH, Lower).

7 After incubation for 1 hour at 37°C, C3 deposition and CD55 were assayed by staining  
8 with FITC-conjugated anti-C3/C3b/iC3b antibody (C3-FITC) and PE-conjugated anti-  
9 CD55 antibody (CD55-PE).

10 C3 fragment deposition on the PNH erythrocytes was negligible in aEcuHS(H) (Top).  
11 The amount of C3 fragment deposition on the erythrocytes was increased (12.0 and  
12 16.8%) in all subjects after incubation in aEcuHS (Middle). However, co-incubation of  
13 C1INH with the acidified, eculizumab-containing serum markedly attenuated (3.7% and  
14 4.1%) C3 fragment deposition on the CD55 deficient erythrocytes (aEcuHS + C1  
15 (Lower).

16

17

18

### 19 **Supplemental Figure 3S: Percent Lysis Demonstration**

20 PNH erythrocytes were incubated with acidified normal human serum without (aNHS)  
21 and with C1INH (aNHS + C1INH); heat-inactivated normal human serum (aNHS[H]);  
22 activated (pH 6.4) eculizumab-containing serum without (aEcuHS) and with C1INH  
23 (aEcuHS + C1INH) and heat-inactivated eculizumab-containing serum (pH 6.4)  
24 (aEcuHS[H]).

25 After 1 hour incubation, the supernatants were collected and absorbance of hemoglobin  
26 measured at 415nm by iMark microreader (Bio-Rad).

27 The percentages of hemolysis were normalized based on 0% lysis (GVB, PH 6.4 only)  
28 and 100% lysis (with water).

29 (a). The percentage of hemolysis of patient 2 and 6 were the highest lysis in aNHS (97.6  
30  $\pm$  1.0 and 85.7  $\pm$  0.8). There was no hemolysis in aNHS (H) (6.5  $\pm$  0.1 and 6.5  $\pm$  0.1)  
31 and in aNHS + C1INH (3.8  $\pm$  0.4 and 1.5  $\pm$  0.1).

32 (b). Hemolysis was decreased when the erythrocytes were treated with EcuHS (11.7  $\pm$   
33 1.2 and 7.5  $\pm$  1.0) compared to aNHS treatment; there were baseline hemolysis in  
34 aEcuHS + C1 (14.7  $\pm$  1.1 and 9.2  $\pm$  0.1); and aEcuHS (H) (16.2  $\pm$  0.9 and 5.7  $\pm$  0.1).

35 Error bars are standard deviations of three separate experiments.

36

1

2 **Supplemental Figure 4S: C1 Inhibition blocks APC-mediated C3 Deposition in PNH**  
3 **Erythrocytes**

4 C3 fragment deposition was analyzed by flow cytometry LSRII (BD Biosciences) in  
5 Patients 2-4 (on eculizumab therapy).

6 At baseline time 0, C3 fragment deposition baseline demonstrated on the PNH  
7 erythrocytes (CD55 deficient) using activated eculizumab- human serum. (aEcuHS, Top)

8

9 At time 1 hour, C3 fragment deposition was increased in all 3 subjects after incubation  
10 with 1:3 dilution of acidified (pH 6.4) eculizumab-containing human serum (aEcuHS,  
11 Middle). Then, C3 fragment deposition was decreased in all 3 subjects after co-  
12 incubation for 1 hour at 37° C with acidified (pH 6.4) eculizumab-containing human  
13 serum (1:2) and C1INH (6U/mL). (aEcuHS +C1, Lower)

14

15 At baseline (T=0) and after incubation for 1 hour at 37°C, C3 deposition and CD55 were  
16 assayed by staining with FITC-conjugated anti-C3/C3b/iC3b antibody (C3-FITC) and PE-  
17 conjugated anti-CD55 antibody (CD55-PE).

Figure 3S

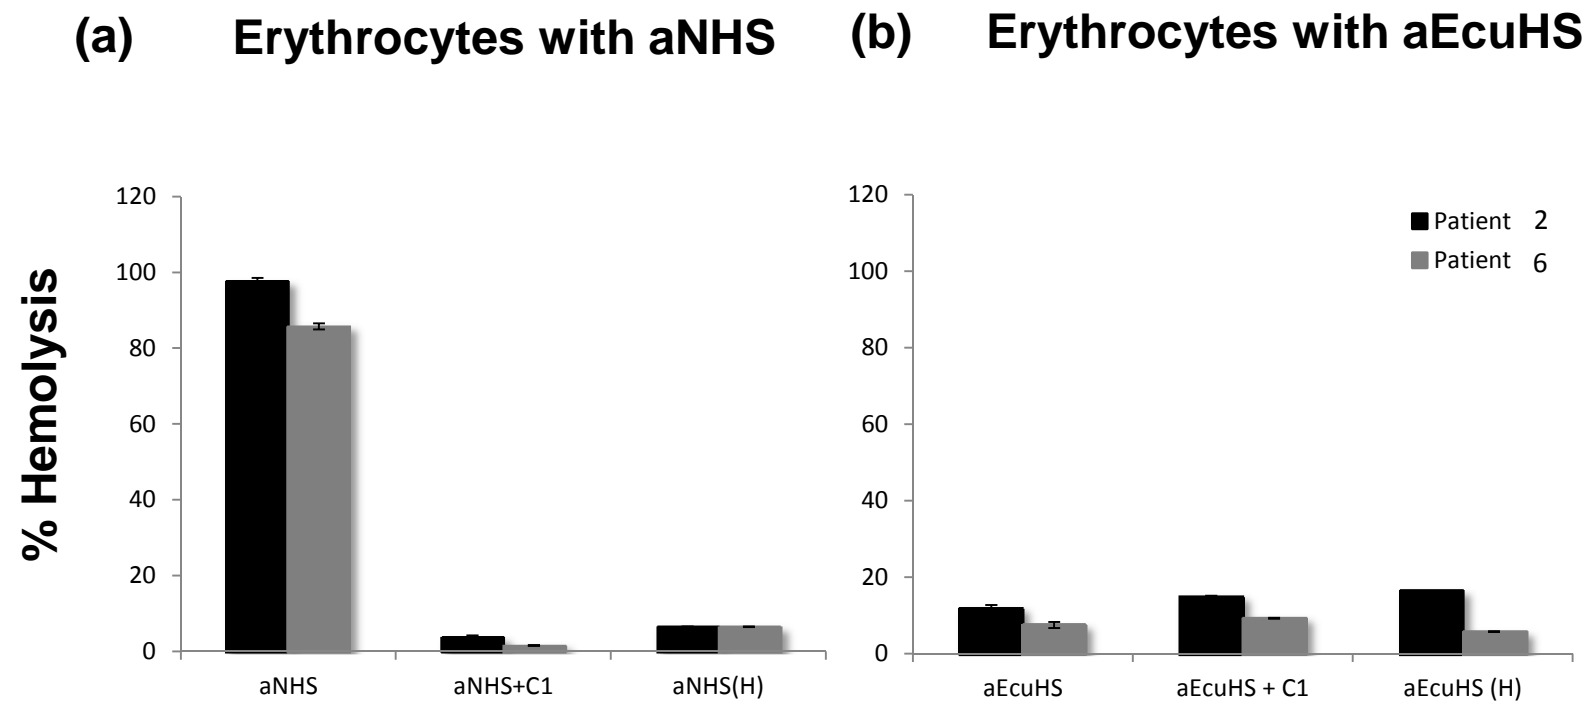

Supplement: NIHMS617272-supplement-supplement_1.pdf [file NIHMS617272-supplement-supplement_1.pdf]
